# Supplementary material
Source: Research Square preprint supplement (doi:10.21203/rs.3.rs-9207685/v1)

**Supplementary Table S1. Complete Search Strategy (MEDLINE, Embase, and Cochrane)**

| **Database** | **Date of Search** | **Search Strategy** | **Limits Applied** |
| --- | --- | --- | --- |
| MEDLINE (via PubMed) | 30 January 2026 | ("Anorectal Malformations"[MeSH] OR "anorectal malformation*"[tiab] OR "imperforate anus"[tiab])  AND (PSARP[tiab] OR "posterior sagittal anorectoplasty"[tiab] OR "single stage"[tiab] OR "one stage"[tiab] OR "primary repair"[tiab] OR "neonatal repair"[tiab] OR staged[tiab] OR "three stage"[tiab] OR colostomy[tiab])  NOT (rectovestibular[tiab] OR perineal[tiab] OR cloaca*[tiab]) | No date or language restriction. Population exclusion terms applied at search stage. |
| Cochrane CENTRAL | 30 January 2026 | (anorectal malformation OR imperforate anus)  AND (PSARP OR posterior sagittal anorectoplasty OR colostomy OR staged OR one-stage OR single-stage) | No date or language restriction. |
| Embase (via Ovid) | 12 March 2026 | ('anorectal malformation'/exp OR 'imperforate anus'/exp OR 'anal atresia')  AND ('posterior sagittal anorectoplasty' OR 'PSARP' OR 'single stage' OR 'one stage' OR 'primary repair' OR 'neonatal repair' OR 'staged' OR 'three stage' OR 'colostomy'/exp)  NOT ('rectovestibular fistula' OR 'perineal fistula' OR 'cloaca'/exp) | No date or language restriction. Emtree terms exploded where applicable. |
| ClinicalTrials.gov and WHO ICTRP | 30 January 2026 | "anorectal malformation" AND ("single stage" OR "primary repair" OR "staged" OR "colostomy") | No eligible registered trials identified. |

*Neonatal population and exclusion of low-type ARM were applied at full-text screening stage according to prespecified eligibility criteria. Reference lists of included studies and prior systematic reviews were manually screened for additional eligible studies. No study-design filter was applied at the search stage.*

**Supplementary Table S2. Excluded Studies with Reasons (n = 10)**

| **#** | **Study** | **Reason for Exclusion** |
| --- | --- | --- |
| 1 | Gil-Vernet 2001 | Staged-only series; no single-stage cohort (1 neonatal case only) |
| 2 | Koga 2010 | Wrong comparator: technique comparison (LAARP vs PSARP); all patients had prior colostomy |
| 3 | Vick 2007 | Single-arm study; no staged comparison group |
| 4 | Miscia 2024 | Systematic review/meta-analysis (excluded study design) |
| 5 | Zhang 2025 | Wrong comparator: 2-stage vs 3-stage LAARP (not single-stage vs staged) |
| 6 | Diao 2014 | Single-arm study; no comparison group |
| 7 | Xiao 2018 (J Laparoendosc) | Single-arm study; no comparison group (n = 17, one-stage only) |
| 8 | Gangopadhyay 2017 | Review article/commentary (excluded study design) |
| 9 | Xiao 2018 (Medicine) | Overlapping cohort with Zhou 2022 (same institution; smaller sample, shorter follow-up) |
| 10 | Zheng 2008 | Mixed ARM population including rectovestibular fistula; high/intermediate data not separately extractable |

**Supplementary Table S3. Early Postoperative Infection Outcomes by Study**

| **Study (Year)** | **Infection Definition** | **Single-stage** | **Staged** | **Key Methodological Issues** |
| --- | --- | --- | --- | --- |
| Liu et al. (2004) | Wound/postoperative infection (not further specified) | 19/65 (29.2%) | 27/48 (56.3%) | Likely cumulative counting across staged procedures; per-procedure denominator unclear |
| Gangopadhyay et al. (2006) | Postoperative wound infection | 7/490 (1.4%) | 91/458 (19.9%) | Denominators differ markedly from continence analysis; likely cumulative counting |
| Zhou et al. (2022) | Surgical site infection following definitive repair | 0/42 (0%) | 2/42 (4.8%) | Clearly defined per-procedure rates; small number of events; p = 0.49 |

*Abbreviations: SSI, surgical site infection.*

**Supplementary Table S4. Detailed ROBINS-I Assessment by Domain**

| **Study** | **Confounding** | **Selection** | **Classification** | **Deviations** | **Missing Data** | **Measurement** | **Reporting** | **Overall** |
| --- | --- | --- | --- | --- | --- | --- | --- | --- |
| **Liu 2004** | Moderate | Low | Low | Low | Moderate | Moderate | Low | Moderate |
| **Gangopadhyay 2006** | Serious | Serious | Low | Moderate | Serious | Moderate | Moderate | Serious |
| **Menon 2017** | Serious | Serious | Low | Moderate | Serious | Moderate | Moderate | Serious |
| **Zhou 2022** | Moderate | Moderate | Low | Low | Moderate | Moderate | Low | Moderate |

*Overall risk of bias determined by the highest level of risk in any domain according to ROBINS-I guidance.*

*Major concerns in studies rated Serious included historical control design, substantial attrition (>40–80%), and survival bias in staged cohorts.*

*Zhou 2022 employed propensity score matching to reduce confounding but remained at moderate risk due to retrospective design and potential unmeasured confounders.*

*No randomized controlled trials were identified.*

**Supplementary Table S5. R Code for Forest Plot and Sensitivity Analyses**

| **Section** | **Description** | **R Code** |
| --- | --- | --- |
| A. | Load Packages | library(meta)  library(dplyr)  dat <- read.csv("MA_INCONTINENCE.csv") |
| B. | Prepare Data | dat2 <- dat %>%  rename(  e1 = single_event, n1 = single_total,  e0 = staged_event, n0 = staged_total  )  stopifnot(all(e1 <= n1), all(e0 <= n0)) |
| C. | Meta-analysis (RR) | m_inc <- metabin(  event.e = e1, n.e = n1,  event.c = e0, n.c = n0,  studlab = study, data = dat2,  sm = "RR", method = "Inverse",  random = TRUE, common = FALSE,  method.tau = "DL"  )  summary(m_inc) |
| D. | Forest Plot | forest(m_inc,  leftcols = "studlab", leftlabs = "Study",  xlab = "Risk Ratio (Postoperative Incontinence)",  xlim = c(0.2, 5), at = c(0.2, 0.5, 1, 2, 5),  fontsize = 9, digits = 2,  print.I2 = TRUE, print.tau2 = TRUE  ) |
| E. | Leave-One-Out | loo <- metainf(m_inc)  print(loo)  forest(loo) |
| F. | Excl. Menon 2017 | m_no_menon <- update(m_inc,  exclude = which(m_inc$studlab == "Menon 2017"))  forest(m_no_menon) |
| G. | Excl. Menon + Gangopadhyay | m_no_two <- update(m_inc,  exclude = which(m_inc$studlab %in%  c("Menon 2017", "Gangopadhyay 2006")))  forest(m_no_two) |

*Effect measure: Risk Ratio (RR). Random-effects model using DerSimonian–Laird estimator. Leave-one-out analysis performed using metainf(). All analyses conducted in R using package meta.*

**Supplementary Figures**

**Supplementary Figure S1. Sensitivity analysis forest plot excluding Menon 2017.**


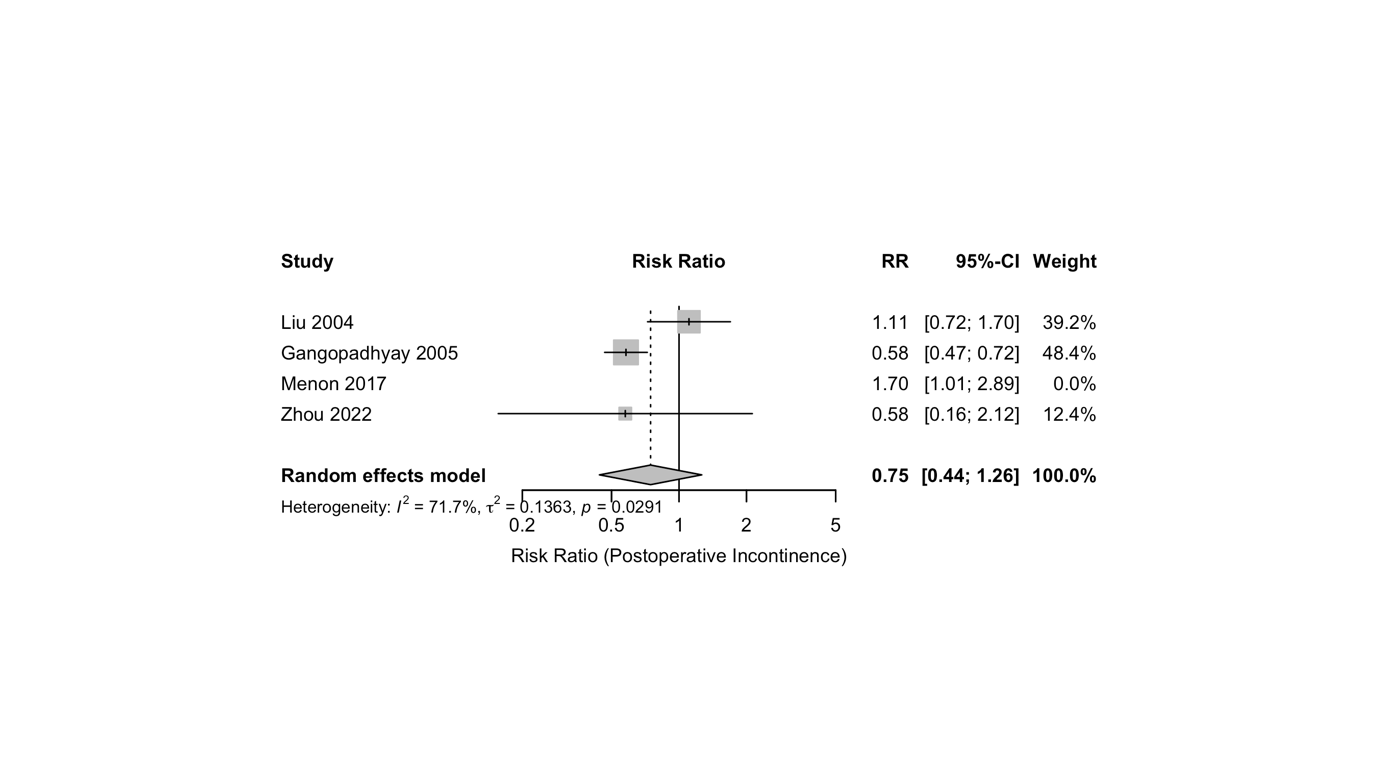


**Supplementary Figure S2. Sensitivity analysis forest plot excluding Menon 2017 and Gangopadhyay 2006.**
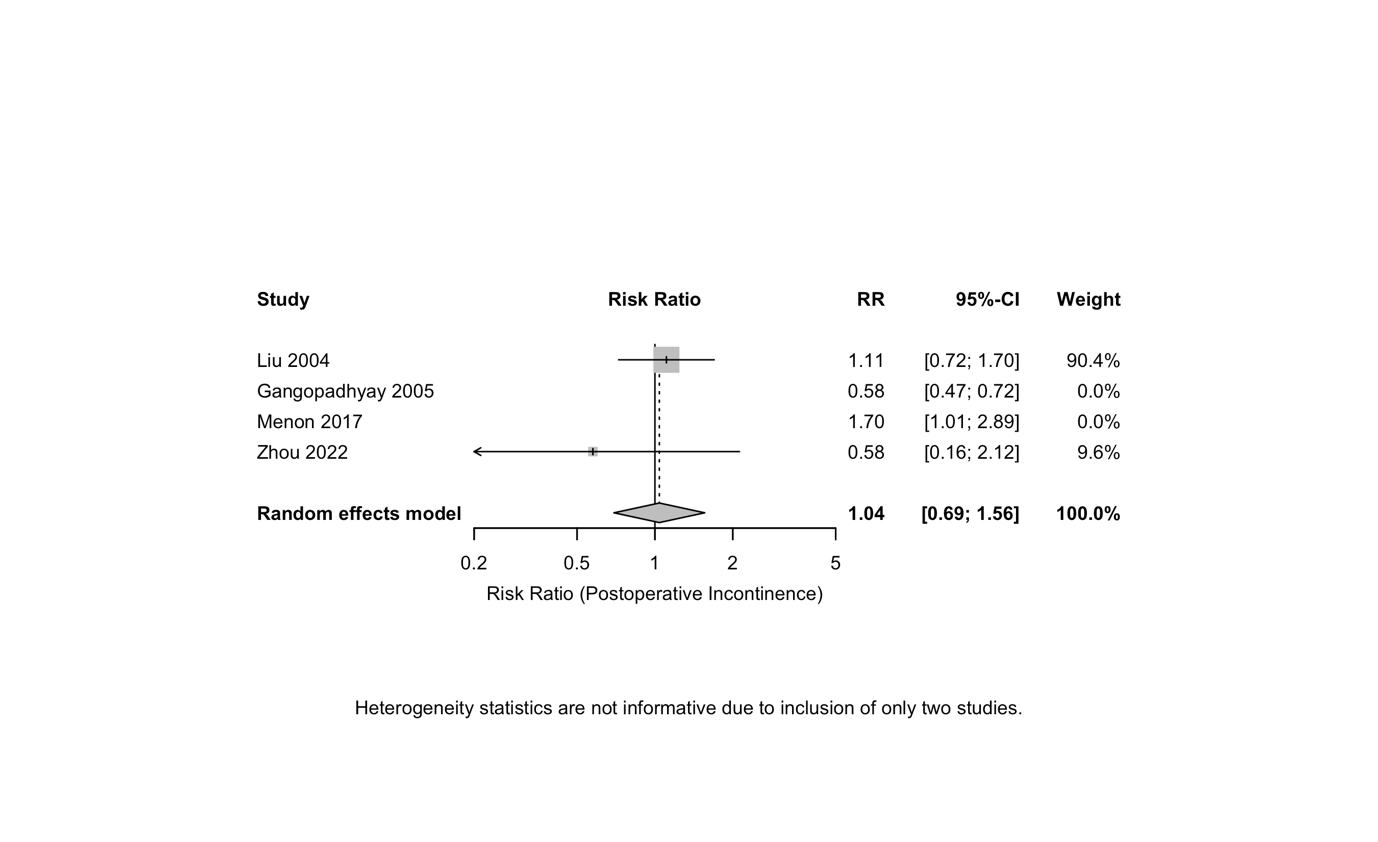

Supplement: Supplementary file 1 [file 393834d96d342374afee2559.docx]
