# Supplementary material
Source: Research Square preprint supplement (doi:10.21203/rs.3.rs-9207685/v1)
Supplement: Supplementary file 2 [file da8fa057fb36e61ce1bfe1a2.docx]

**PRISMA 2020 Checklist**

*Single-stage versus staged reconstruction for high and intermediate anorectal malformations in neonates: a systematic review and meta-analysis*

| **Section and Topic** | **Item #** | **Checklist Item** | **Reported on Page #/Section** |
| --- | --- | --- | --- |
| TITLE | 1 | Identify the report as a systematic review | Title page, line 1 |
| ABSTRACT | 2 | Structured summary (background, methods, results, conclusions) | Abstract |
| **INTRODUCTION** |  |  |  |
| Rationale | 3 | Describe the rationale for the review in the context of existing knowledge | Introduction, para 1-3 |
| Objectives | 4 | Provide an explicit statement of the objective(s) | Introduction, para 4 |
| **METHODS** |  |  |  |
| Eligibility criteria | 5 | Specify the inclusion and exclusion criteria for the review | Methods: Eligibility Criteria |
| Information sources | 6 | Describe all information sources searched and date last searched | Methods: Information Sources; Supp Table S1 |
| Search strategy | 7 | Present the full search strategy for at least one database | Supplementary Table S1 |
| Selection process | 8 | Specify the methods used to decide eligibility of studies and resolve disagreements | Methods: Study Selection |
| Data collection process | 9 | Describe the method of data extraction and any processes for confirming data | Methods: Data Extraction |
| Data items | 10a | List and define all outcome measures synthesized | Methods: Eligibility Criteria (Outcomes) |
|  | 10b | List and define all other variables for which data were sought | Methods: Data Extraction |
| Study risk of bias assessment | 11 | Describe methods used to assess risk of bias in included studies | Methods: Risk of Bias Assessment (ROBINS-I) |
| Effect measures | 12 | Specify the effect measures used | Methods: Data Synthesis (RR, 95% CI) |
| Synthesis methods | 13a | Describe the processes used to decide which studies were eligible for each synthesis | Methods: Data Synthesis |
|  | 13b | Describe any methods required to prepare the data for presentation or synthesis | Methods: Data Synthesis |
|  | 13c | Describe any methods used to tabulate or visually display results of individual studies and syntheses | Figures 2-3; Tables 1-3 |
|  | 13d | Describe any methods used to synthesize results and provide a rationale for the choice(s) | Methods: Data Synthesis (DL random-effects) |
|  | 13e | Describe any methods used to explore possible causes of heterogeneity | Methods: Data Synthesis (sensitivity analyses) |
|  | 13f | Describe any sensitivity analyses conducted to assess robustness of the synthesized results | Methods: Data Synthesis; Results |
| Reporting bias assessment | 14 | Describe methods used to assess risk of bias due to missing results | Methods: Data Synthesis (not formally assessed; <10 studies) |
| Certainty assessment | 15 | Describe any methods used to assess certainty in the body of evidence | Methods: Certainty of Evidence (GRADE) |
| **RESULTS** |  |  |  |
| Study selection | 16a | Describe the results of the search and selection process | Results: Study Selection; Figure 1 |
|  | 16b | Cite studies that might appear to meet the inclusion criteria but were excluded, and explain why | Supplementary Table S2 |
| Study characteristics | 17 | Cite each included study and present its characteristics | Results: Study Characteristics; Table 1 |
| Risk of bias in studies | 18 | Present assessments of risk of bias for each included study | Results: Risk of Bias; Figure 2; Supp Table S4 |
| Results of individual studies | 19 | Present results of all individual studies for each synthesis | Results: Bowel Incontinence; Table 2 |
| Results of syntheses | 20a | For each synthesis, briefly summarise the characteristics and risk of bias among contributing studies | Results: Bowel Incontinence |
|  | 20b | Present results of all statistical syntheses conducted | Results: Bowel Incontinence; Figure 3 |
|  | 20c | Present results of all investigations of possible causes of heterogeneity | Results: sensitivity analyses |
|  | 20d | Present results of all sensitivity analyses conducted | Results: Bowel Incontinence, para 4 |
| Reporting biases | 21 | Present assessments of risk of bias due to missing results | Not formally assessed (<10 studies) |
| Certainty of evidence | 22 | Present assessments of certainty in the body of evidence | Results: Certainty of Evidence; Table 3 |
| **DISCUSSION** |  |  |  |
| Discussion | 23a | Provide a general interpretation of the results in the context of other evidence | Discussion: Summary; Interpretation |
|  | 23b | Discuss any limitations of the evidence included in the review | Discussion: Why Evidence Remains Inconclusive |
|  | 23c | Discuss any limitations of the review processes used | Discussion: Strengths and Limitations |
|  | 23d | Discuss implications of the results for practice, policy, and future research | Discussion: Clinical Implications; Feasibility |
| **OTHER INFORMATION** |  |  |  |
| Registration and protocol | 24a | Provide registration information for the review, including register name and registration number | Title page: PROSPERO CRD420261291319 |
|  | 24b | Indicate where the review protocol can be accessed, or state that a protocol was not prepared | Methods: Protocol and Registration |
|  | 24c | Describe and explain any amendments to information provided at registration | Discussion: Strengths and Limitations (case series not performed) |
| Support | 25 | Describe sources of financial or non-financial support and the role of the funders | Title page: Funding |
| Competing interests | 26 | Declare any competing interests of review authors | Title page: Conflicts of interest |
| Availability of data | 27 | Report which of the following are publicly available and where they can be found | Data Availability section |

*From: Page MJ, McKenzie JE, Bossuyt PM, et al. The PRISMA 2020 statement: an updated guideline for reporting systematic reviews. BMJ 2021;372:n71.*
