# Supplementary material
Source: Research Square preprint supplement (doi:10.21203/rs.3.rs-9207685/v1)
Supplement: Supplementary file 3 [file f3c3043930cfa641f9e18c7a.docx]

# ELECTRONIC SUPPLEMENTARY MATERIAL

• Online Resource 1: Complete Search Strategy (MEDLINE, Embase, and Cochrane)

• Online Resource 2: Excluded Studies with Reasons (n=10)

• Online Resource 3: Early Postoperative Infection Outcomes (Narrative Synthesis)

• Online Resource 4: Detailed ROBINS-I Assessment by Domain

• Online Resource 5: Sensitivity Analysis Forest Plot (Excluding Menon 2017)

• Online Resource 6: Sensitivity Analysis Forest Plot (Excluding Menon + Gangopadhyay)
